# Supplementary material for: Mortality and survival in idiopathic pulmonary fibrosis: a systematic review and meta-analysis
Source: PubMed Central journal article supplement — ERJ Open Res. 2022 Mar 14;8(1):00591-2021. doi: 10.1183/23120541.00591-2021 (PMC8918939; doi:10.1183/23120541.00591-2021), 2022-03-14
Supplement: 00591-2021.SUPPLEMENT.pdf [file 00591-2021.SUPPLEMENT.pdf]

## **Online Supplement:**

### **Manuscript Title:**

Mortality and survival in idiopathic pulmonary fibrosis: a systematic review and meta-analysis

Qiang Zheng<sup>1,4,7</sup>, Ingrid A. Cox<sup>1,4</sup>, Julie A. Campbell<sup>1</sup>, Qing Xia<sup>1</sup>, Petr Otahal<sup>1</sup>, Barbara de Graaff<sup>1</sup>, Tamera J. Corte<sup>4,5,6</sup>, Alan K Y Teoh<sup>4,5,6</sup>, \*E. Haydn Walters<sup>2,3</sup> and \*Andrew J. Palmer<sup>1,3,4</sup>

\*Joint senior authors

### **Affiliations:**

<sup>1</sup>Menzies Institute for Medical Research, University of Tasmania, Hobart, Tasmania, Australia. <sup>2</sup>School of Medicine, University of Tasmania, Hobart, Tasmania, Australia.

<sup>3</sup>School of Population and Global Health, University of Melbourne, Melbourne, Victoria, Australia.

<sup>4</sup>NHMRC Centre of Research Excellence for Pulmonary Fibrosis, Camperdown, Australia.

<sup>5</sup>Central Clinical School, The University of Sydney, Camperdown, Australia.

<sup>6</sup>Dept of Respiratory and Sleep Medicine, Royal Prince Alfred Hospital, Camperdown, Australia.

<sup>7</sup>Dept of Anesthesiology (High-Tech Branch), the First Affiliated Hospital of Anhui Medical University, Hefei, Anhui, China.

**Correspondence:** Andrew J. Palmer, Menzies Institute for Medical Research, Private bag 23, Hobart, TAS 7001, Australia. Email: [andrew.palmer@utas.edu.au](mailto:andrew.palmer@utas.edu.au)

**Table of content:**

**Supplement 1. PRISMA 2009 checklist.....3**

**Supplement 2. Database search strategy .....6**

**Supplement 3. A tool for quality assessment .....7**

**Supplement 4. Diagnostic criteria.....9**

**Supplement 5. Results of quality assessment .....10**

**Supplement 6. Publication bias.....13**

## Supplement 1 PRISMA 2009 checklist

**TABLE S1** PRISMA 2009 checklist

| Section/topic             | #  | Checklist item                                                                                                                                                                                                                                                                                              | Reported on page # |
|---------------------------|----|-------------------------------------------------------------------------------------------------------------------------------------------------------------------------------------------------------------------------------------------------------------------------------------------------------------|--------------------|
| <b>TITLE</b>              |    |                                                                                                                                                                                                                                                                                                             |                    |
| Title                     | 1  | Identify the report as a systematic review, meta-analysis, or both.                                                                                                                                                                                                                                         | 1                  |
| <b>ABSTRACT</b>           |    |                                                                                                                                                                                                                                                                                                             |                    |
| Structured summary        | 2  | Provide a structured summary including, as applicable: background; objectives; data sources; study eligibility criteria, participants, and interventions; study appraisal and synthesis methods; results; limitations; conclusions and implications of key findings; systematic review registration number. | 2                  |
| <b>INTRODUCTION</b>       |    |                                                                                                                                                                                                                                                                                                             |                    |
| Rationale                 | 3  | Describe the rationale for the review in the context of what is already known.                                                                                                                                                                                                                              | 3                  |
| Objectives                | 4  | Provide an explicit statement of questions being addressed with reference to participants, interventions, comparisons, outcomes, and study design (PICOS).                                                                                                                                                  | 4                  |
| <b>METHODS</b>            |    |                                                                                                                                                                                                                                                                                                             |                    |
| Protocol and registration | 5  | Indicate if a review protocol exists, if and where it can be accessed (e.g., Web address), and, if available, provide registration information including registration number.                                                                                                                               | 4                  |
| Eligibility criteria      | 6  | Specify study characteristics (e.g., PICOS, length of follow-up) and report characteristics (e.g., years considered, language, publication status) used as criteria for eligibility, giving rationale.                                                                                                      | 4-5                |
| Information sources       | 7  | Describe all information sources (e.g., databases with dates of coverage, contact with study authors to identify additional studies) in the search and date last searched.                                                                                                                                  | 4                  |
| Search                    | 8  | Present full electronic search strategy for at least one database, including any limits used, such that it could be repeated.                                                                                                                                                                               | 4                  |
| Study selection           | 9  | State the process for selecting studies (i.e., screening, eligibility, included in systematic review, and, if applicable, included in the meta-analysis).                                                                                                                                                   | 4-5                |
| Data collection process   | 10 | Describe method of data extraction from reports (e.g., piloted forms, independently, in duplicate) and any processes for obtaining and confirming data from investigators.                                                                                                                                  | 5-6                |

|                                    |    |                                                                                                                                                                                                                        |     |
|------------------------------------|----|------------------------------------------------------------------------------------------------------------------------------------------------------------------------------------------------------------------------|-----|
| Data items                         | 11 | List and define all variables for which data were sought (e.g., PICOS, funding sources) and any assumptions and simplifications made.                                                                                  | 5-6 |
| Risk of bias in individual studies | 12 | Describe methods used for assessing risk of bias of individual studies (including specification of whether this was done at the study or outcome level), and how this information is to be used in any data synthesis. | 7   |
| Summary measures                   | 13 | State the principal summary measures (e.g., risk ratio, difference in means).                                                                                                                                          | 7   |
| Synthesis of results               | 14 | Describe the methods of handling data and combining results of studies, if done, including measures of consistency (e.g., $I^2$ ) for each meta-analysis.                                                              | 7   |

| Section/topic                 | #  | Checklist item                                                                                                                                                                                           | Reported on page # |
|-------------------------------|----|----------------------------------------------------------------------------------------------------------------------------------------------------------------------------------------------------------|--------------------|
| Risk of bias across studies   | 15 | Specify any assessment of risk of bias that may affect the cumulative evidence (e.g., publication bias, selective reporting within studies).                                                             | 7                  |
| Additional analyses           | 16 | Describe methods of additional analyses (e.g., sensitivity or subgroup analyses, meta-regression), if done, indicating which were pre-specified.                                                         | 7                  |
| <b>RESULTS</b>                |    |                                                                                                                                                                                                          |                    |
| Study selection               | 17 | Give numbers of studies screened, assessed for eligibility, and included in the review, with reasons for exclusions at each stage, ideally with a flow diagram.                                          | 7                  |
| Study characteristics         | 18 | For each study, present characteristics for which data were extracted (e.g., study size, PICOS, follow-up period) and provide the citations.                                                             | 7                  |
| Risk of bias within studies   | 19 | Present data on risk of bias of each study and, if available, any outcome level assessment (see item 12).                                                                                                | 8                  |
| Results of individual studies | 20 | For all outcomes considered (benefits or harms), present, for each study: (a) simple summary data for each intervention group (b) effect estimates and confidence intervals, ideally with a forest plot. | 8-9                |
| Synthesis of results          | 21 | Present results of each meta-analysis done, including confidence intervals and measures of consistency.                                                                                                  | 8-9                |
| Risk of bias across studies   | 22 | Present results of any assessment of risk of bias across studies (see Item 15).                                                                                                                          | 9                  |
| Additional analysis           | 23 | Give results of additional analyses, if done (e.g., sensitivity or subgroup analyses, meta-regression [see Item 16]).                                                                                    | 8-9                |
| <b>DISCUSSION</b>             |    |                                                                                                                                                                                                          |                    |

|                     |    |                                                                                                                                                                                      |       |
|---------------------|----|--------------------------------------------------------------------------------------------------------------------------------------------------------------------------------------|-------|
| Summary of evidence | 24 | Summarize the main findings including the strength of evidence for each main outcome; consider their relevance to key groups (e.g., healthcare providers, users, and policy makers). | 10-12 |
| Limitations         | 25 | Discuss limitations at study and outcome level (e.g., risk of bias), and at review-level (e.g., incomplete retrieval of identified research, reporting bias).                        | 12    |
| Conclusions         | 26 | Provide a general interpretation of the results in the context of other evidence, and implications for future research.                                                              | 12    |
| <b>FUNDING</b>      |    |                                                                                                                                                                                      |       |
| Funding             | 27 | Describe sources of funding for the systematic review and other support (e.g., supply of data), role of funders for the systematic review.                                           | 12-13 |

From: Moher D, Liberati A, Tetzlaff J, Altman DG, The PRISMA Group (2009). Preferred Reporting Items for Systematic Reviews and Meta-Analyses: The PRISMA Statement. PLoS Med 6(7): e1000097. doi:10.1371/journal.pmed1000097

## Supplement 2 Database search strategy

**TABLE S2** Database search strategy for mortality and survival in IPF

|                                                                                                                                                                                                                                                                                                                                                                                                                                                                                                                                                         |
|---------------------------------------------------------------------------------------------------------------------------------------------------------------------------------------------------------------------------------------------------------------------------------------------------------------------------------------------------------------------------------------------------------------------------------------------------------------------------------------------------------------------------------------------------------|
| <p><b>Embase (Ovid):</b></p> <ol style="list-style-type: none"><li>1. idiopathic pulmonary fibrosis.tw.</li><li>2. cryptogenic fibrosing alveolitis.tw.</li><li>3. usual interstitial pneumonitis.tw.</li><li>4. usual interstitial pneumonia.tw.</li><li>5. fibrosing alveolitis.tw.</li><li>6. IPF.tw.</li><li>7. 1 or 2 or 3 or 4 or 5 or 6</li><li>8. mortality.tw.</li><li>9. survival.tw.</li><li>10. 8 or 9</li><li>11. 7 and 10</li><li>12. limit 11 to (human and yr="1950 - 2021")</li></ol>                                                  |
| <p><b>PubMed:</b></p> <p>(((((((((idiopathic pulmonary fibrosis[MeSH Terms]) OR (idiopathic pulmonary fibrosis[Text Word])) OR (cryptogenic fibrosing alveolitis[Text Word])) OR (usual interstitial pneumonitis[Text Word])) OR (usual interstitial pneumonia[Text Word])) OR (fibrosing alveolitis[Text Word])) OR (IPF[Text Word])) AND (((Mortality[MeSH Terms]) OR (Mortality[Text Word])) OR ((Survival[MeSH Terms]) OR (Survival[Text Word])))) AND (("1900/01/01"[Date - Publication] : "2021/11/01"[Date - Publication])) Filters: Humans.</p> |
| <p><b>Scopus:</b></p> <p>((TITLE-ABS-KEY ("MORTALITY") OR TITLE-ABS-KEY ("SURVIVAL")) AND PUBYEAR &gt; 1959 AND PUBYEAR &lt; 2022) AND ((TITLE-ABS-KEY (" IDIOPATHIC PULMONARY FIBROSIS") OR TITLE-ABS-KEY ("CRYPTOGENIC FIBROSING ALVEOLITIS") OR TITLE-ABS-KEY ("USUAL INTERSTITIAL PNEUMONITIS") OR TITLE-ABS-KEY ("USUAL INTERSTITIAL PNEUMONIA") OR TITLE-ABS-KEY ("FIBROSING ALVEOLITIS") OR TITLE-ABS-KEY ("IPF"))))</p>                                                                                                                         |

### Supplement 3 A tool for quality assessment

There are a total of 26 items for quality assessment and each of them has been evaluated as one of three responses (yes, no, and not mentioned/not applicable) based on the description of study characteristics. When the item only responses to yes, one point adds to this study. Total quality score of each study is the summary of each item. The formula used for calculating the index ( $Q$ ) of quality for each study is  $Q = \frac{x}{26} * 100\%$ , in which  $x$  indicates the total scores of each study. We defined quality of studies as three levels: low, moderate, and high when  $Q \leq 50\%$ ,  $50\% < Q \leq 70\%$ , and  $Q > 70\%$ , respectively. The outcomes of quality score were expressed as percentage with interquartile range (IQR).

**TABLE S3a** Case definition criteria for IPF subjects [1, 2]

| Element                                               | Quality assessment criteria                                                                                                                                                                   | Items |
|-------------------------------------------------------|-----------------------------------------------------------------------------------------------------------------------------------------------------------------------------------------------|-------|
| <b>Exclusion of other causes of ILDs</b>              | Have other potential causes of ILDs or pulmonary fibrosis been excluded in the subjects? (environmental/domestic/occupational exposures, connective tissue disease, drug toxicity, radiation) | C1    |
|                                                       | Did the author specify if the clinical diagnosis was made by a multi-disciplinary team?                                                                                                       | C2    |
|                                                       | Was the diagnosis made based on the classic signs, symptoms, and physical examination characteristics of IPF?                                                                                 | C3    |
|                                                       | Is there any FVC tests done for the subjects?                                                                                                                                                 | C4    |
| <b>Clinical characteristics</b>                       | Are there any other respiratory physiology tests mentioned if an FVC was not done? (Spirometry, TLC, DL <sub>CO</sub> , FEV, etc)                                                             | C5    |
|                                                       | Was timing of onset symptoms recorded? i.e., is there indication of when disease process was first evident, rather than when diagnosed?                                                       | C6    |
| <b>High-resolution computerised tomography (HRCT)</b> | Was the diagnosis in subjects made based on HRCT?                                                                                                                                             | C7    |
|                                                       | Was the pattern consistent with the American Thoracic Society guidelines for usual interstitial pneumonia (UIP)?                                                                              | C8    |
|                                                       | Is there mention of the diagnosis being made by two radiologists?                                                                                                                             | C9    |
| <b>Histopathological confirmation</b>                 | If diagnosis was not made by HRCT in subjects, was there mention of histopathological confirmation?                                                                                           | C10   |
|                                                       | Was the pattern consistent with the ATS guidelines?                                                                                                                                           | C11   |
|                                                       | Is there mention of the diagnosis being made by two pathologists?                                                                                                                             | C12   |
| <b>Characteristics of IPF subjects</b>                | Does the article adequately report participant characteristics? (Such as age distribution, sex distribution, and race/ethnicity)                                                              | C13   |

IPF: idiopathic pulmonary fibrosis; ILDs: interstitial lung diseases; HRCT: High-resolution computerised tomography; ATS: American Thoracic Society; UIP: usual interstitial pneumonia; FVC: forced vital capacity; DL<sub>CO</sub>: diffusing capacity of the lung for carbon monoxide; FEV: forced expiratory volume; TLC: total lung capacity.

**TABLE S3b** Study methodology criteria for epidemiological studies [3-7]

| <b>Element</b>         | <b>Quality assessment criteria</b>                                                                                                    | <b>Items</b> |
|------------------------|---------------------------------------------------------------------------------------------------------------------------------------|--------------|
| <b>Population</b>      | Were the sampling methods described? What sampling methods were used (prevalence studies or population-based studies)?                | M1           |
|                        | Is the sample representative of the target population?                                                                                | M2           |
|                        | Does the paper make mention of inclusion and exclusion criteria?                                                                      | M3           |
|                        | Were standardised data collection methods/protocols used?                                                                             | M4           |
|                        | Was the methodology described insufficient detail?                                                                                    | M5           |
|                        | Was the timeframe for data collection specified in the paper?                                                                         | M6           |
| <b>Data collection</b> | Did the study directly sample the population or were medical records, databases and registries used for data collection?              | M7           |
|                        | If medical records, databases/ registries were used, was standardised/up to date terminology or codes used for IPF, e.g., ICD coding? | M8           |
| <b>Data analysis</b>   | Were appropriate statistical methods used for analysis? Did the analysis methods take into consideration the sampling methods?        | M9           |
|                        | Was the denominator for the population specified?                                                                                     | M10          |
|                        | Were survival rates, mortality reported in standardised formats (per 100 000/population/specified timeframe)?                         | M11          |
|                        | Did the reports include confidence intervals?                                                                                         | M12          |
|                        | Was there mention of how missing data were managed?                                                                                   | M13          |

ICD: International Classification of Diseases.



#### Supplement 4 Diagnostic criteria

For global mortality statistics, Table S4 shows the development of International Classification of Diseases (ICD) codes for IPF. We summarize annual mortality rates of IPF from included studies based on the ICD codes, because it is routinely used to calculate mortality statistics worldwide. There are various ICD codes (such as ICD-8 517, ICD-9 515, ICD-9 516.3 and ICD-10 J84.1) to record the death certificate of people with IPF [8-10]. Although ICD-10 code J84.1 may include other idiopathic interstitial pneumonias (IIPs) (such as nonspecific interstitial pneumonia, cryptogenic organizing pneumonia, and acute interstitial pneumonia), it is the most specific code for IPF to present global mortality statistics in the study timeframe [3]. Future studies report mortality statistics for IPF should use stricter and narrower ICD codes (e.g., ICD-11 CB03.4) [10].

In terms of survival statistics for IPF worldwide, the 2000 ATS/ERS guideline [12] on IPF represented a first platform for diagnostic criteria. The 2002 ATS/ERS guideline [13] on IIPs represented disease classification for IIPs and suggested the final diagnosis of IPF should be rendered only after the multidiscipline team (MDT) including pulmonologist, radiologist, and pathologist. Despite this remarkable progress, the latest 2011 ATS/ERS/JRS/ALAT guideline [1] had dramatically changed the criteria for IPF diagnosis in both radiological and histological aspects.

**TABLE S4** Development of diagnostic criteria for IPF based on ICD codes.

| ICD codes                                                | Case definition                                                                                                                                                                                                                     | Years Covered | Reference |
|----------------------------------------------------------|-------------------------------------------------------------------------------------------------------------------------------------------------------------------------------------------------------------------------------------|---------------|-----------|
| <b>ICD-8</b><br>517                                      | Other chronic interstitial pneumonia                                                                                                                                                                                                | 1968-1978     | [8]       |
| <b>ICD-9</b><br>515<br>516.3                             | Postinflammatory pulmonary fibrosis<br>Idiopathic fibrosing alveolitis                                                                                                                                                              | 1979-1998     | [9]       |
| <b>ICD-10</b><br>J84<br>J84.0<br>J84.1<br>J84.8<br>J84.9 | Other interstitial pulmonary disease<br>Alveolar and parieto-alveolar conditions<br>Other interstitial pulmonary diseases with fibrosis<br>Other specified interstitial lung disease<br>Interstitial pulmonary disease, unspecified | 1999-2018     | [10]      |
| <b>ICD-11</b><br>CB03.4                                  | Idiopathic pulmonary fibrosis                                                                                                                                                                                                       | 2019-present  | [11]      |

ICD-n: International Classification of Disease nth Revision; IPF: Idiopathic Pulmonary Fibrosis.

## Supplement 5 Results of quality assessment

**TABLE S5** A detailed scoring for both case definition and study methodology criteria for each study

| First author (year) Ref.          | Score for case definition | Score for study methodology | Total score | Quality index (%) | Quality level |
|-----------------------------------|---------------------------|-----------------------------|-------------|-------------------|---------------|
| <b>Mortality statistics (n=6)</b> |                           |                             |             |                   |               |
| Algranti (2017) [21]              | 1                         | 12                          | 13          | 50.0              | Moderate      |
| Hutchinson (2014) [22]            | 1                         | 12                          | 13          | 50.0              | Moderate      |
| Jeganathan (2021) [23]            | 2                         | 12                          | 14          | 53.8              | Moderate      |
| Marcon (2021) [24]                | 1                         | 12                          | 13          | 50.0              | Moderate      |
| Marshall (2018) [25]              | 1                         | 12                          | 13          | 50.0              | Moderate      |
| Navaratnam (2011) [26]            | 1                         | 12                          | 13          | 50.0              | Moderate      |
| <b>Survival statistics (n=62)</b> |                           |                             |             |                   |               |
| Adegunsoye (2020) [27]            | 8                         | 10                          | 18          | 69.2              | Moderate      |
| Aggarwal (2017) [28]              | 8                         | 9                           | 17          | 65.4              | Moderate      |
| Akyil (2016) [29]                 | 9                         | 10                          | 19          | 73.1              | High          |
| Alakhras (2007) [30]              | 8                         | 10                          | 18          | 69.2              | Moderate      |
| Alhamad (2008) [31]               | 9                         | 10                          | 19          | 73.1              | High          |
| Antoniou (2020) [32]              | 9                         | 11                          | 20          | 76.9              | High          |
| Araki (2003) [33]                 | 8                         | 9                           | 17          | 65.4              | Moderate      |
| Bando (2014) [34]                 | 9                         | 9                           | 18          | 69.2              | Moderate      |
| Barlo (2009) * [35]               | 9                         | 9                           | 18          | 69.2              | Moderate      |
| Bjoraker (1998) [36]              | 10                        | 9                           | 19          | 73.1              | High          |
| Cai (2014) [37]                   | 9                         | 9                           | 18          | 69.2              | Moderate      |
| Collard (2004) [38]               | 8                         | 10                          | 18          | 69.2              | Moderate      |
| Costabel (2017) [39]              | 8                         | 9                           | 17          | 65.4              | Moderate      |
| Doubkova (2017) [40]              | 9                         | 9                           | 18          | 69.2              | Moderate      |
| Douglas (2000) [41]               | 8                         | 9                           | 17          | 65.4              | Moderate      |
| Fernández Pérez (2010) [42]       | 9                         | 11                          | 20          | 76.9              | High          |
| Gao (2021) [43]                   | 10                        | 10                          | 20          | 76.9              | High          |
| Guiot (2018) [44]                 | 10                        | 10                          | 20          | 76.9              | High          |
| Hamada (2007) [45]                | 8                         | 10                          | 18          | 69.2              | Moderate      |
| Hopkins (2016) [46]               | 1                         | 11                          | 12          | 46.2              | Low           |
| Jacob (2017) [47]                 | 9                         | 9                           | 18          | 69.2              | Moderate      |
| Jeon (2006) [48]                  | 11                        | 10                          | 21          | 80.8              | High          |
| Jo (2017) [49]                    | 9                         | 10                          | 19          | 73.1              | High          |
| Kang (2020) [50]                  | 9                         | 10                          | 19          | 73.1              | High          |
| Kärkkäinen (2017) [51]            | 9                         | 9                           | 18          | 69.2              | Moderate      |
| Kaunisto (2019) [52]              | 11                        | 9                           | 20          | 76.9              | High          |
| Kim (2012) [54]                   | 8                         | 10                          | 18          | 69.2              | Moderate      |
| Kim (2015) [53]                   | 9                         | 10                          | 19          | 73.1              | High          |
| Ko (2021) [55]                    | 5                         | 12                          | 17          | 65.4              | Moderate      |
| Kondoh (2005) [56]                | 9                         | 9                           | 18          | 69.2              | Moderate      |
| Koo (2016) [57]                   | 8                         | 9                           | 17          | 65.4              | Moderate      |
| Kreuter (2016) [58]               | 9                         | 10                          | 19          | 73.1              | High          |
| Kurashima (2010) [59]             | 10                        | 9                           | 19          | 73.1              | High          |
| Lai (2019) [60]                   | 9                         | 9                           | 18          | 69.2              | Moderate      |
| Lassenius (2019) [61]             | 8                         | 10                          | 18          | 69.2              | Moderate      |
| Le Rouzic (2015) [62]             | 10                        | 10                          | 20          | 76.9              | High          |
| Lindell (2015) [63]               | 8                         | 10                          | 18          | 69.2              | Moderate      |
| Mancuzo (2018) [64]               | 9                         | 10                          | 19          | 73.1              | High          |
| Mapel (1998) [65]                 | 7                         | 10                          | 17          | 65.4              | Moderate      |
| Margaritopoulos (2018) [66]       | 8                         | 9                           | 17          | 65.4              | Moderate      |
| Mejia (2009) [67]                 | 8                         | 9                           | 17          | 65.4              | Moderate      |
| Moon (2008) † [68]                | 10                        | 10                          | 20          | 76.9              | High          |
| Mura (2012) [69]                  | 10                        | 9                           | 19          | 73.1              | High          |
| Nadrous (2004) [70]               | 8                         | 9                           | 17          | 65.4              | Moderate      |

|                            |    |    |    |      |          |
|----------------------------|----|----|----|------|----------|
| Nathan (2020) [71]         | 8  | 10 | 18 | 69.2 | Moderate |
| Natsuizaka (2014) [72]     | 8  | 11 | 19 | 73.1 | High     |
| Nicholson (2000) [73]      | 9  | 9  | 18 | 69.2 | Moderate |
| Ogawa (2018) [74]          | 8  | 9  | 17 | 65.4 | Moderate |
| Reid (2015) [75]           | 8  | 9  | 17 | 65.4 | Moderate |
| Ryerson (2013) [76]        | 10 | 10 | 20 | 76.9 | High     |
| Shin (2008) [77]           | 9  | 9  | 18 | 69.2 | Moderate |
| Strand (2014) [78]         | 8  | 10 | 18 | 69.2 | Moderate |
| Strongman (2018) [79]      | 2  | 12 | 14 | 53.8 | Moderate |
| Su (2011) [80]             | 8  | 9  | 17 | 65.4 | Moderate |
| Sugino (2014) [81]         | 8  | 9  | 17 | 65.4 | Moderate |
| Tarride (2018) [82]        | 5  | 11 | 16 | 61.5 | Moderate |
| Tran (2020) [83]           | 10 | 9  | 19 | 73.1 | High     |
| Turner-warwick (1980) [84] | 7  | 9  | 16 | 61.5 | Moderate |
| Vietri (2020) [85]         | 8  | 9  | 17 | 65.4 | Moderate |
| Watanabe (2019) [86]       | 8  | 9  | 17 | 65.4 | Moderate |
| Zhang (2016) [87]          | 9  | 9  | 18 | 69.2 | Moderate |
| Zurkova (2019) [88]        | 8  | 10 | 18 | 69.2 | Moderate |

\*: Non-English (Netherlandish) study; †: one study including two independent cohorts.

(a)

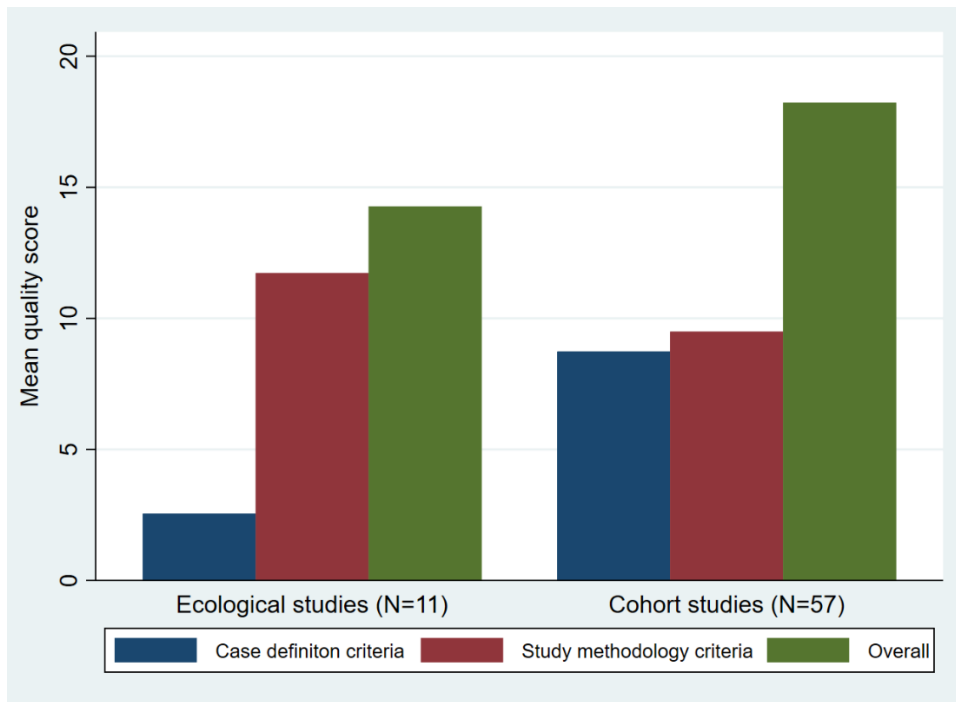

(b)

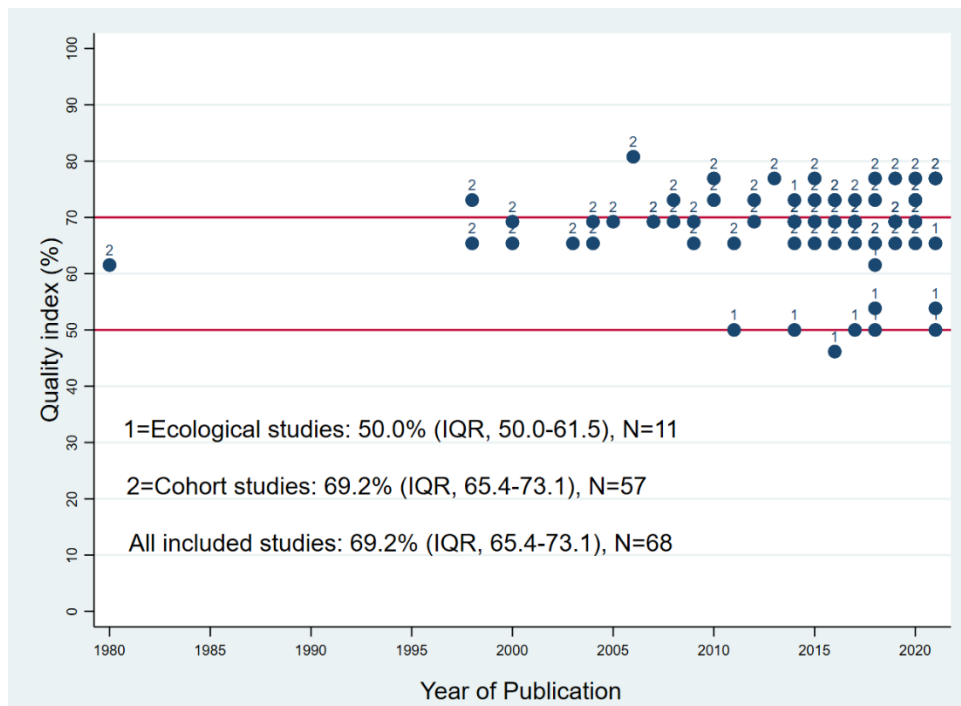

**FIGURE S1** Quality assessment for all included studies; (a) mean quality scores for ecological and cohort studies according to various criteria (case definition and study methodology criteria); (b) quality index for ecological and cohort studies based on various years of publication.

Supplement 6 Publication bias

(a)

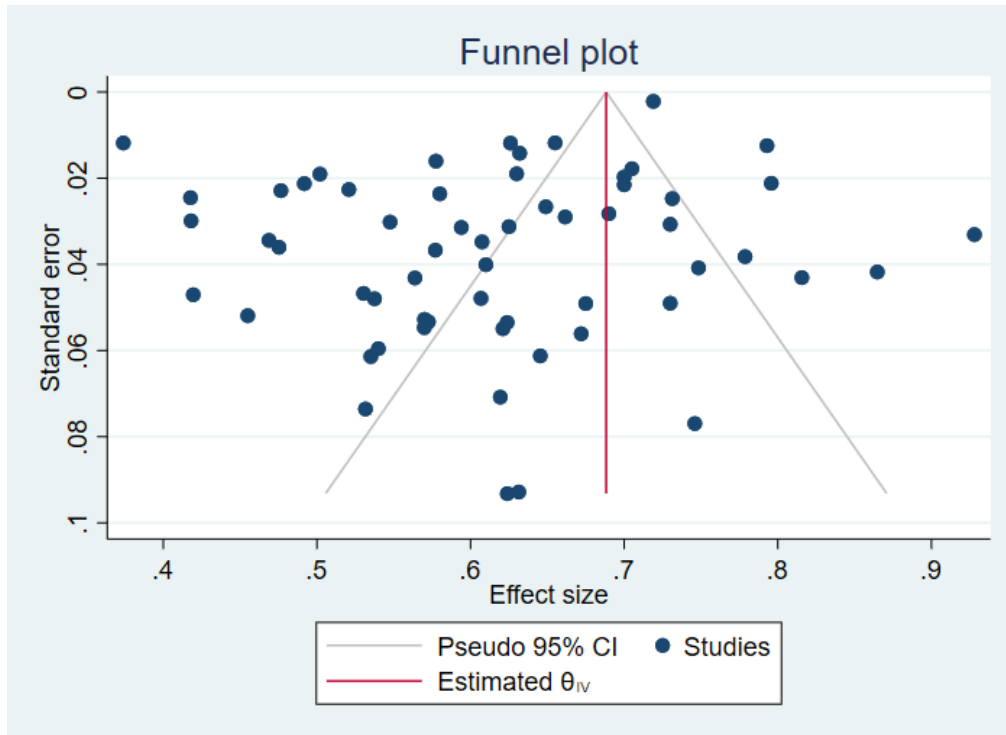

(b)

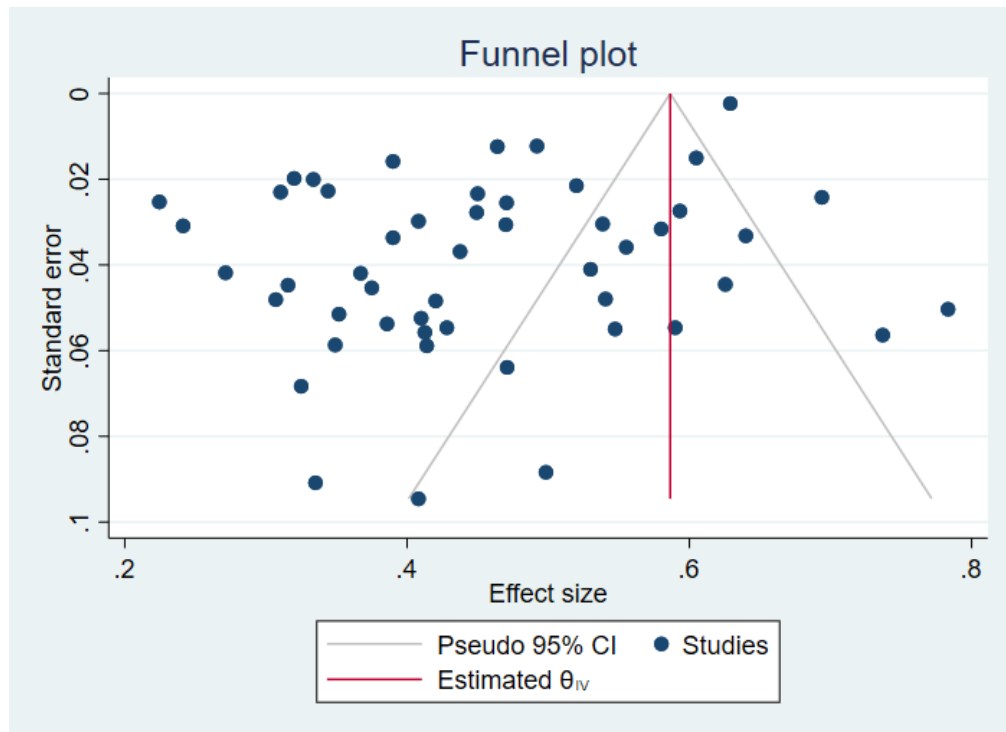

FIGURE S2 Funnel plots for cumulative survival rates. a): 3-year survival rates; b): 5-year survival rates.

## Reference

1. Raghu G, Collard HR, Egan JJ, Martinez FJ, Behr J, Brown KK, Colby TV, Cordier JF, Flaherty KR, Lasky JA, Lynch DA, Ryu JH, Swigris JJ, Wells AU, Ancochea J, Bouros D, Carvalho C, Costabel U, Ebina M, Hansell DM, Johkoh T, Kim DS, King TE, Jr., Kondoh Y, Myers J, Müller NL, Nicholson AG, Richeldi L, Selman M, Dudden RF, Griss BS, Protzko SL, Schönemann HJ. An official ATS/ERS/JRS/ALAT statement: idiopathic pulmonary fibrosis: evidence-based guidelines for diagnosis and management. *Am J Respir Crit Care Med* 2011; 183(6): 788-824.
2. Raghu G, Remy-Jardin M, Myers JL, Richeldi L, Ryerson CJ, Lederer DJ, Behr J, Cottin V, Danoff SK, Morell F, Flaherty KR, Wells A, Martinez FJ, Azuma A, Bice TJ, Bouros D, Brown KK, Collard HR, Duggal A, Galvin L, Inoue Y, Jenkins RG, Johkoh T, Kazerooni EA, Kitaichi M, Knight SL, Mansour G, Nicholson AG, Pipavath SNJ, Buendía-Roldán I, Selman M, Travis WD, Walsh S, Wilson KC. Diagnosis of Idiopathic Pulmonary Fibrosis. An Official ATS/ERS/JRS/ALAT Clinical Practice Guideline. *Am J Respir Crit Care Med* 2018; 198(5): e44-e68.
3. Hutchinson J, Fogarty A, Hubbard R, McKeever T. Global incidence and mortality of idiopathic pulmonary fibrosis: a systematic review. *Eur Respir J* 2015; 46(3): 795-806.
4. Kamiya Y, Fujisawa T, Kono M, Nakamura H, Yokomura K, Koshimizu N, Toyoshima M, Imokawa S, Sumikawa H, Johkoh T, Yasui H, Hozumi H, Suzuki Y, Karayama M, Furuhashi K, Enomoto N, Nakamura Y, Inui N, Suda T. Prognostic factors for primary Sjögren's syndrome-associated interstitial lung diseases. *Respiratory Medicine* 2019; 159.
5. Lomas A, Leonardi- Bee J, Bath- Hextall F. A systematic review of worldwide incidence of nonmelanoma skin cancer. *British Journal of Dermatology* 2012; 166(5): 1069-1080.
6. Prins J, Blanker MH, Bohnen AM, Thomas S, Bosch JLHR. Prevalence of erectile dysfunction: a systematic review of population-based studies. *International Journal of Impotence Research* 2002; 14(6): 422-432.
7. Munn Z, Moola S, Riitano D, Lisy K. The development of a critical appraisal tool for use in systematic reviews addressing questions of prevalence. *Int J Health Policy Manag* 2014; 3(3): 123-128.
8. World Health Assembly, 19. (1966). Eighth revision of the International Classification of Diseases. World Health Organization. <https://apps.who.int/iris/handle/10665/89390>
9. World Health Organization. (1978). International classification of diseases: [9th] ninth revision, basic tabulation list with alphabetic index. World Health Organization. <https://apps.who.int/iris/handle/10665/39473>.
10. World Health Organization. (2015). International statistical classification of diseases and related health problems, 10th revision, Fifth edition, 2016. World Health Organization. <https://apps.who.int/iris/handle/10665/246208>.
11. World Health Organization. (2018). International statistical classification for Mortality and Morbidity Statistics (ICD-11 MMS), 11th revision, 2018 version, Geneva: World Health Organization. <https://icd.who.int/browse11/l-m/en>.
12. American Thoracic Society. Idiopathic pulmonary fibrosis: diagnosis and treatment. International consensus statement. American Thoracic Society (ATS), and the European Respiratory Society (ERS). *Am J Respir Crit Care Med*. 2000;161(2 Pt 1):646-664.

13. Society AT. American Thoracic Society/European Respiratory Society International Multidisciplinary Consensus Classification of the Idiopathic Interstitial Pneumonias. *American Journal of Respiratory and Critical Care Medicine* 2002; 165(2): 277-304.
